# Supplementary material for: Autonomic Phenotypes in Chronic Fatigue Syndrome (CFS) Are Associated with Illness Severity: A Cluster Analysis
Source: MDPI journal article supplement (doi:10.3390/jcm9082531), 2020-08-05
Supplement: s1 [file s1]

**Supplementary file 1:** Mean results for all individual questions of Chalder Fatigue Scale and mean results of fatigue scales (Fatigue Severity Scale and Fatigue Impact Scale), anxiety and depression for all participants.

| ID      | CFQ | FSS | FIS | HADS_1 | HADS_2 | BDI | GROUP                         |
|---------|-----|-----|-----|--------|--------|-----|-------------------------------|
| cfs_001 | 29  | 45  | 118 | 8      | 12     | 15  | sympathetic with dysautonomia |
| cfs_002 | 27  | 56  | 92  | 10     | 6      | 12  | sympathetic with dysautonomia |
| cfs_003 | 28  | 54  | 121 | 10     | 10     | 22  | sympathetic with dysautonomia |
| cfs_004 | 29  | 58  | 120 | 8      | 9      | 17  | parasympathetic               |
| cfs_005 | 22  | 55  | 88  | 13     | 7      | 16  | parasympathetic               |
| cfs_006 | 16  | 42  | 57  | 10     | 6      | 11  | balance                       |
| cfs_007 | 28  | 42  | 91  | 15     | 11     | 20  | parasympathetic               |
| cfs_008 | 20  | 42  | 45  | 4      | 5      | 9   | sympathetic                   |
| cfs_009 | 23  | 48  | 85  | 13     | 12     | 12  | balance                       |
| cfs_010 | 21  | 39  | 76  | 13     | 8      | 17  | balance                       |
| cfs_011 | 29  | 51  | 112 | 15     | 13     | 26  | sympathetic with dysautonomia |
| cfs_012 | 21  | 26  | 65  | 7      | 4      | 5   | balance                       |
| cfs_013 | 25  | 54  | 81  | 9      | 11     | 22  | sympathetic with dysautonomia |
| cfs_014 | 19  | 45  | 67  | 7      | 5      | 10  | sympathetic                   |
| cfs_015 | 26  | 38  | 61  | 9      | 6      | 15  | balance                       |
| cfs_016 | 20  | 33  | 93  | 6      | 4      | 10  | balance                       |
| cfs_017 | 18  | 30  | 69  | 11     | 14     | 16  | balance                       |
| cfs_018 | 28  | 48  | 98  |        |        | 43  | sympathetic with dysautonomia |
| cfs_019 | 21  | 34  | 60  | 7      | 7      | 8   | balance                       |
| cfs_020 | 30  | 63  | 134 | 9      | 11     | 18  | parasympathetic               |
| cfs_021 | 22  | 47  | 39  | 4      | 7      | 10  | balance                       |
| cfs_022 | 27  | 42  | 58  | 5      | 4      | 12  | balance                       |
| cfs_023 | 30  | 61  | 134 | 14     | 10     | 31  | sympathetic with dysautonomia |
| cfs_024 | 23  | 42  | 87  | 13     | 9      | 13  | balance                       |
| cfs_025 | 30  | 53  | 111 | 12     | 10     | 17  | sympathetic with dysautonomia |
| cfs_026 | 27  | 60  | 100 | 9      | 12     | 27  | parasympathetic               |
| cfs_027 | 29  | 43  | 96  | 12     | 6      | 16  | balance                       |
| cfs_028 | 28  | 46  | 72  | 10     | 7      | 16  | sympathetic with dysautonomia |
| cfs_029 | 30  | 54  | 106 | 9      | 11     | 29  | parasympathetic               |
| cfs_030 | 29  | 63  | 140 | 16     | 11     | 28  | parasympathetic               |
| cfs_031 | 28  | 52  | 100 | 9      | 7      | 15  | sympathetic with dysautonomia |
| cfs_032 | 27  | 47  | 105 | 6      | 2      | 16  | balance                       |
| cfs_033 | 23  | 44  | 87  | 10     | 7      | 23  | parasympathetic               |
| cfs_034 | 26  | 54  | 74  | 6      | 9      | 9   | parasympathetic               |
| cfs_035 | 24  | 47  | 108 | 9      | 12     | 27  | parasympathetic               |
| cfs_036 | 31  | 46  | 99  | 13     | 6      | 22  | parasympathetic               |
| cfs_037 | 20  | 35  | 26  | 11     | 10     | 16  | sympathetic                   |
| cfs_038 | 27  | 45  | 80  | 12     | 6      | 18  | sympathetic with dysautonomia |
| cfs_039 | 27  | 54  | 92  | 9      | 6      | 9   | parasympathetic               |
| cfs_040 | 22  | 42  | 63  | 8      | 5      | 5   | balance                       |
| cfs_041 | 32  | 63  | 148 | 13     | 17     | 32  | parasympathetic               |
| cfs_042 | 24  | 54  | 78  | 6      | 5      | 14  | balance                       |
| cfs_043 | 25  | 51  | 87  | 4      | 5      | 9   | balance                       |
| cfs_044 | 27  | 58  | 96  | 14     | 7      | 20  | sympathetic with dysautonomia |
| cfs_045 | 28  | 51  | 99  | 11     | 13     | 20  | sympathetic with dysautonomia |
| cfs_046 | 21  | 42  | 93  | 12     | 6      | 14  | sympathetic with dysautonomia |
| cfs_047 | 25  | 59  | 111 | 9      | 11     | 26  | sympathetic with dysautonomia |
| cfs_048 | 21  | 38  | 57  | 8      | 6      | 15  | balance                       |

|         |    |    |     |    |    |    |                               |
|---------|----|----|-----|----|----|----|-------------------------------|
| cfs_049 | 22 | 48 | 83  | 4  | 12 | 20 | balance                       |
| cfs_050 | 23 | 53 | 107 | 9  | 5  | 4  | sympathetic with dysautonomia |
| cfs_051 | 26 | 57 | 98  | 8  | 10 | 19 | parasympathetic               |
| cfs_052 | 21 | 44 | 93  | 11 | 7  | 13 | sympathetic with dysautonomia |
| cfs_053 | 27 | 60 | 108 | 9  | 11 | 15 | parasympathetic               |
| cfs_054 | 31 | 39 | 80  | 12 | 8  | 13 | balance                       |
| cfs_055 | 26 | 58 | 120 | 14 | 10 | 28 | parasympathetic               |
| cfs_056 | 29 | 57 | 110 | 14 | 11 | 24 | sympathetic with dysautonomia |
| cfs_057 | 21 | 55 | 121 | 14 | 13 | 34 | sympathetic with dysautonomia |
| cfs_058 | 26 | 47 | 110 | 8  | 14 | 29 | sympathetic with dysautonomia |
| cfs_059 | 32 | 63 | 153 | 10 | 14 | 19 | sympathetic with dysautonomia |
| cfs_060 | 29 | 41 | 94  | 4  | 7  | 8  | sympathetic with dysautonomia |
| cfs_061 | 25 | 48 | 87  | 11 | 9  | 29 | sympathetic with dysautonomia |
| cfs_062 | 21 | 58 | 91  | 14 | 11 | 16 | parasympathetic               |
| cfs_063 | 20 | 37 | 67  | 5  | 6  | 15 | sympathetic with dysautonomia |
| cfs_064 | 28 | 62 | 114 | 6  | 8  | 28 | sympathetic with dysautonomia |
| cfs_065 | 24 | 49 | 87  | 10 | 7  | 11 | balance                       |
| cfs_066 | 14 | 29 | 18  | 9  | 7  | 15 | balance                       |
| cfs_067 | 12 | 28 | 15  | 3  | 4  | 6  | sympathetic                   |
| cfs_068 | 22 | 15 | 16  | 12 | 10 | 8  | balance                       |
| cfs_069 | 22 | 54 | 61  | 15 | 2  | 17 | sympathetic with dysautonomia |
| cfs_070 | 22 | 47 | 67  | 8  | 9  | 15 | balance                       |
| cfs_071 | 18 | 45 | 80  | 11 | 10 | 25 | parasympathetic               |
| cfs_072 | 21 | 15 | 21  | 1  | 6  | 9  | balance                       |
| cfs_073 | 22 | 51 | 74  | 6  | 7  | 3  | balance                       |
| cfs_074 | 18 | 18 | 16  | 8  | 3  | 14 | balance                       |
| cfs_075 | 27 | 51 | 66  | 9  | 6  | 14 | parasympathetic               |
| cfs_076 | 19 | 51 | 47  | 10 | 7  | 14 | balance                       |
| cfs_077 | 21 | 48 | 22  | 11 | 5  | 13 | balance                       |
| cfs_078 | 17 | 41 | 49  | 7  | 2  | 12 | balance                       |
| cfs_079 | 22 | 54 | 72  | 15 | 6  | 27 | parasympathetic               |
| cfs_080 | 22 | 49 | 46  | 14 | 7  | 11 | sympathetic with dysautonomia |
| cfs_081 | 19 | 41 | 21  | 6  | 2  | 2  | balance                       |
| cfs_082 | 26 | 48 | 61  | 14 | 9  | 21 | parasympathetic               |
| cfs_083 | 26 | 55 | 81  | 13 | 5  | 13 | sympathetic with dysautonomia |
| cfs_084 | 19 | 46 | 18  | 14 | 4  | 11 | sympathetic                   |
| cfs_085 | 21 | 46 | 60  | 5  | 2  | 2  | balance                       |
| cfs_086 | 21 | 49 | 12  | 8  | 8  | 6  | balance                       |
| cfs_087 | 19 | 56 | 44  | 6  | 2  | 9  | sympathetic with dysautonomia |
| cfs_088 | 21 | 16 | 67  | 6  | 2  | 4  | balance                       |
| cfs_089 | 19 | 46 | 54  | 5  | 5  |    | balance                       |
| cfs_090 |    |    |     | 9  | 10 | 11 | balance                       |
| cfs_091 | 22 | 48 | 27  | 7  | 11 | 7  | balance                       |
| cfs_092 | 21 | 47 | 72  | 10 | 10 | 16 | balance                       |
| cfs_093 | 21 | 46 | 58  | 5  | 6  | 7  | sympathetic with dysautonomia |
| cfs_094 | 11 | 49 | 71  | 7  | 5  | 18 | sympathetic with dysautonomia |
| cfs_095 |    |    |     | 6  | 5  | 16 | balance                       |
| cfs_096 | 28 | 54 | 92  | 4  | 11 | 11 | sympathetic with dysautonomia |
| cfs_097 | 26 | 46 | 69  | 7  | 6  | 9  | balance                       |
| cfs_098 | 26 | 52 | 91  | 10 | 12 | 24 | sympathetic with dysautonomia |

|                |    |    |    |    |    |    |                               |
|----------------|----|----|----|----|----|----|-------------------------------|
| <b>cfs_099</b> | 33 | 54 | 96 | 16 | 11 | 17 | sympathetic with dysautonomia |
| <b>cfs_100</b> | 17 | 48 | 49 | 1  | 4  | 6  | balance                       |
| <b>cfs_101</b> | 23 | 49 | 86 | 11 | 15 | 21 | sympathetic with dysautonomia |
| <b>cfs_102</b> | 15 | 42 | 29 | 3  | 3  | 7  | balance                       |

## CFQ\_QUESTIONS

[illegible]

|         |   |   |   |   |   |   |   |   |   |   |   |
|---------|---|---|---|---|---|---|---|---|---|---|---|
| cfs_024 | 2 | 2 | 2 | 3 | 2 | 2 | 2 | 3 | 1 | 1 | 3 |
| cfs_025 | 3 | 3 | 3 | 3 | 3 | 3 | 3 | 3 | 3 | 3 | 3 |
| cfs_026 | 3 | 2 | 3 | 3 | 3 | 3 | 3 | 3 | 0 | 2 | 2 |
| cfs_027 | 3 | 3 | 2 | 3 | 3 | 3 | 2 | 3 | 2 | 2 | 3 |
| cfs_028 | 3 | 3 | 3 | 2 | 3 | 3 | 3 | 2 | 2 | 2 | 2 |
| cfs_029 | 3 | 3 | 3 | 3 | 2 | 3 | 3 | 2 | 3 | 3 | 2 |
| cfs_030 | 3 | 3 | 3 | 2 | 3 | 3 | 3 | 3 | 2 | 1 | 3 |
| cfs_031 | 3 | 2 | 2 | 2 | 2 | 3 | 2 | 3 | 3 | 3 | 3 |
| cfs_032 | 3 | 3 | 0 | 3 | 3 | 1 | 3 | 3 | 3 | 2 | 3 |
| cfs_033 | 2 | 2 | 2 | 2 | 3 | 3 | 3 | 1 | 2 | 1 | 2 |
| cfs_034 | 3 | 3 | 3 | 1 | 3 | 3 | 3 | 2 | 1 | 2 | 2 |
| cfs_035 | 2 | 2 | 2 | 2 | 2 | 1 | 2 | 2 | 3 | 3 | 3 |
| cfs_036 | 3 | 3 | 3 | 3 | 3 | 3 | 3 | 3 | 3 | 2 | 2 |
| cfs_037 | 2 | 2 | 2 | 2 | 2 | 2 | 2 | 2 | 1 | 1 | 2 |
| cfs_038 | 3 | 2 | 3 | 2 | 3 | 3 | 2 | 2 | 3 | 2 | 2 |
| cfs_039 | 3 | 3 | 3 | 1 | 3 | 3 | 3 | 2 | 2 | 2 | 2 |
| cfs_040 | 2 | 2 | 2 | 1 | 2 | 1 | 2 | 2 | 3 | 2 | 3 |
| cfs_041 | 3 | 3 | 3 | 3 | 3 | 3 | 3 | 2 | 3 | 3 | 3 |
| cfs_042 | 2 | 2 | 3 | 2 | 3 | 2 | 2 | 1 | 2 | 3 | 2 |
| cfs_043 | 3 | 2 | 3 | 2 | 2 | 2 | 3 | 2 | 1 | 2 | 3 |
| cfs_044 | 3 | 3 | 3 | 3 | 3 | 3 | 2 | 2 | 2 | 3 | 3 |
| cfs_045 | 3 | 2 | 3 | 2 | 3 | 3 | 2 | 2 | 3 | 2 | 3 |
| cfs_046 | 3 | 2 | 2 | 1 | 2 | 2 | 2 | 2 | 1 | 2 | 2 |
| cfs_047 | 3 | 3 | 3 | 2 | 3 | 2 | 3 | 2 | 1 | 0 | 3 |
| cfs_048 | 2 | 2 | 2 | 2 | 2 | 2 | 2 | 2 | 2 | 1 | 2 |
| cfs_049 | 3 | 2 | 3 | 2 | 3 | 2 | 2 | 2 | 0 | 1 | 2 |
| cfs_050 | 2 | 2 | 2 | 1 | 2 | 2 | 2 | 2 | 3 | 3 | 2 |
| cfs_051 | 2 | 2 | 2 | 3 | 2 | 3 | 3 | 3 | 3 | 3 | 2 |
| cfs_052 | 1 | 2 | 2 | 2 | 2 | 1 | 2 | 2 | 2 | 2 | 3 |
| cfs_053 | 2 | 3 | 3 | 2 | 3 | 3 | 3 | 2 | 2 | 1 | 3 |

|         |   |   |   |   |   |   |   |   |   |   |   |
|---------|---|---|---|---|---|---|---|---|---|---|---|
| cfs_054 | 3 | 3 | 3 | 2 | 3 | 3 | 3 | 3 | 3 | 2 | 3 |
| cfs_055 | 3 | 3 | 3 | 3 | 3 | 2 | 3 | 2 | 2 | 2 | 2 |
| cfs_056 | 2 | 3 | 2 | 3 | 3 | 2 | 3 | 3 | 2 | 3 | 3 |
| cfs_057 | 2 | 3 | 2 | 2 | 2 | 2 | 2 | 2 | 2 | 0 | 2 |
| cfs_058 | 3 | 3 | 3 | 1 | 3 | 1 | 1 | 3 | 2 | 3 | 3 |
| cfs_059 | 3 | 3 | 3 | 2 | 3 | 3 | 3 | 3 | 3 | 3 | 3 |
| cfs_060 | 3 | 3 | 3 | 3 | 2 | 2 | 2 | 3 | 3 | 3 | 2 |
| cfs_061 | 2 | 2 | 3 | 2 | 3 | 2 | 3 | 2 | 2 | 2 | 2 |
| cfs_062 | 2 | 2 | 2 | 2 | 3 | 3 | 3 | 3 | 1 | 1 | 1 |
| cfs_063 | 2 | 2 | 3 | 2 | 2 | 2 | 2 | 3 | 1 | 1 | 2 |
| cfs_064 | 3 | 3 | 3 | 3 | 3 | 2 | 3 | 2 | 2 | 2 | 2 |
| cfs_065 | 3 | 2 | 3 | 3 | 3 | 3 | 2 | 2 | 1 | 2 | 0 |
| cfs_066 | 1 | 1 | 2 | 1 | 2 | 0 | 1 | 2 | 1 | 1 | 2 |
| cfs_067 | 2 | 1 | 0 | 0 | 2 | 2 | 2 | 2 | 0 | 0 | 1 |
| cfs_068 | 2 | 2 | 3 | 2 | 2 | 3 | 3 | 2 | 1 | 0 | 2 |
| cfs_069 | 2 | 3 | 2 | 2 | 2 | 1 | 2 | 2 | 2 | 2 | 2 |
| cfs_070 | 2 | 2 | 2 | 2 | 2 | 2 | 2 | 2 | 2 | 2 | 2 |
| cfs_071 | 2 | 1 | 2 | 1 | 2 | 1 | 2 | 2 | 1 | 1 | 3 |
| cfs_072 | 3 | 3 | 3 | 1 | 3 | 2 | 2 | 1 | 1 | 2 | 2 |
| cfs_073 | 2 | 2 | 3 | 2 | 2 | 2 | 2 | 2 | 2 | 2 | 1 |
| cfs_074 | 2 | 2 | 2 | 1 | 1 | 1 | 2 | 2 | 1 | 2 | 2 |
| cfs_075 | 3 | 3 | 3 | 3 | 3 | 1 | 2 | 2 | 2 | 2 | 3 |
| cfs_076 | 1 | 2 | 2 | 2 | 1 | 2 | 2 | 2 | 2 | 2 | 1 |
| cfs_077 | 2 | 2 | 2 | 2 | 2 | 3 | 3 | 2 | 1 | 1 | 1 |
| cfs_078 | 2 | 2 | 1 | 2 | 2 | 2 | 2 | 1 | 1 | 1 | 1 |
| cfs_079 | 2 | 2 | 2 | 2 | 2 | 1 | 2 | 3 | 2 | 2 | 2 |
| cfs_080 | 2 | 2 | 2 | 2 | 2 | 2 | 2 | 2 | 2 | 2 | 2 |
| cfs_081 | 2 | 2 | 2 | 2 | 2 | 1 | 1 | 2 | 2 | 2 | 1 |
| cfs_082 | 3 | 3 | 3 | 2 | 2 | 2 | 2 | 3 | 2 | 2 | 2 |
| cfs_083 | 3 | 2 | 3 | 2 | 3 | 3 | 3 | 2 | 1 | 2 | 2 |

|                |   |   |   |   |   |   |   |   |   |   |   |   |
|----------------|---|---|---|---|---|---|---|---|---|---|---|---|
| <b>cfs_084</b> | 2 | 2 | 2 | 1 | 2 | 1 | 2 | 2 | 2 | 2 | 2 | 1 |
| <b>cfs_085</b> | 3 | 2 | 2 | 2 | 2 | 2 | 2 | 2 | 2 | 2 | 2 | 2 |
| <b>cfs_086</b> | 2 | 2 | 2 | 2 | 3 | 2 | 2 | 3 | 1 | 1 | 1 | 1 |
| <b>cfs_087</b> | 1 | 2 | 2 | 2 | 2 | 1 | 1 | 2 | 2 | 2 | 2 | 2 |
| <b>cfs_088</b> | 2 | 2 | 2 | 2 | 2 | 2 | 2 | 2 | 2 | 2 | 2 | 1 |
| <b>cfs_089</b> | 2 | 2 | 2 | 1 | 2 | 1 | 1 | 2 | 2 | 2 | 2 | 2 |
| <b>cfs_090</b> | 1 | 2 | 2 | 2 | 1 | 1 | 2 | 1 | 1 | 1 | 1 | 1 |
| <b>cfs_091</b> | 2 | 2 | 3 | 2 | 2 | 1 | 2 | 2 | 2 | 2 | 2 | 2 |
| <b>cfs_092</b> | 2 | 2 | 2 | 2 | 2 | 2 | 2 | 2 | 2 | 2 | 2 | 3 |
| <b>cfs_093</b> | 2 | 2 | 2 | 2 | 2 | 1 | 2 | 2 | 2 | 2 | 2 | 2 |
| <b>cfs_094</b> | 3 | 3 | 3 | 2 | 3 | 3 | 3 | 3 | 3 | 2 | 2 | 3 |
| <b>cfs_095</b> | 1 | 2 | 2 | 2 | 2 | 2 | 2 | 2 | 2 | 2 | 2 | 1 |
| <b>cfs_096</b> | 3 | 3 | 3 | 3 | 3 | 3 | 3 | 2 | 2 | 1 | 1 | 2 |
| <b>cfs_097</b> | 2 | 3 | 3 | 3 | 2 | 2 | 2 | 3 | 2 | 2 | 2 | 2 |
| <b>cfs_098</b> | 3 | 3 | 2 | 2 | 3 | 3 | 3 | 3 | 2 | 2 | 2 | 0 |
| <b>cfs_099</b> | 3 | 3 | 3 | 3 | 3 | 3 | 3 | 3 | 3 | 3 | 3 | 3 |
| <b>cfs_100</b> | 2 | 2 | 1 | 2 | 2 | 2 | 1 | 1 | 1 | 1 | 1 | 2 |
| <b>cfs_101</b> | 3 | 3 | 2 | 3 | 3 | 2 | 2 | 3 | 3 | 2 | 2 | 3 |
| <b>cfs_102</b> | 2 | 2 | 2 | 1 | 2 | 1 | 1 | 1 | 1 | 1 | 1 | 1 |
