# Supplementary material for: Autonomic Phenotypes in Chronic Fatigue Syndrome (CFS) Are Associated with Illness Severity: A Cluster Analysis
Source: MDPI journal article supplement (doi:10.3390/jcm9082531), 2020-08-05
Supplement: s1 [file s1]

Table S1. Relationship between questions answers in CFQ and arterial stiffness parameters in linear

|                                                           | PWVaortic |      |        | Aixaortic |     |        | SBPaortic |     |        |
|-----------------------------------------------------------|-----------|------|--------|-----------|-----|--------|-----------|-----|--------|
|                                                           | Beta      | p    | R2     | Bet<br>a  | p   | R2     | Bet<br>a  | p   | R2     |
| CFQ_Do you have problems with tiredness?                  | 0.27      | 0.07 | 0.60   | 0.06      | 0.7 | 0.60   | 0.15      | 0.3 | 0.60   |
| CFQ_Do you need to rest more?                             | -0.04     | 0.77 | 0.56   | -         | 0.3 | 0.56   | -         | 0.5 | 0.56   |
| CFQ_Do you feel sleepy or drowsy?                         | -0.26     | 0.03 | 0.32   | 0.13      | 0.1 | 0.32   | 0.09      | 0.0 | 0.31   |
| CFQ_Do you have problems starting things?                 | -0.19     | 0.11 | 0.31   | -         | 0.2 | 0.31   | -         | 0.7 | 0.34   |
| CFQ_Do you lack energy?                                   | 0.04      | 0.79 | 0.53   | 0.12      | 0.6 | 0.53   | 0.04      | 0.3 | 0.52   |
| CFQ_Do you have less strength in your muscles?            | 0.03      | 0.85 | 0.48   | -         | 0.9 | 0.48   | -         | 0.9 | 0.48   |
| CFQ_Do you feel weak?                                     | 0.14      | 0.31 | 0.50   | 0.02      | 0.0 | 0.50   | 0.00      | 0.3 | 0.50   |
| CFQ_Do you have difficulties concentrating?               | -0.01     | 0.96 | 0.24   | 0.38      | 1   | 0.24   | 0.14      | 1   | 0.24   |
| CFQ_Do you make slips of the tongue when speaking?        | -0.17     | 0.21 | 0.50   | -         | 0.6 | 0.50   | -         | 0.9 | 0.24   |
| CFQ_Do you find it more difficult to find the right word? | 0.01      | 0.92 | 0.43   | -         | 0.8 | 0.43   | -         | 0.1 | 0.50   |
| CFQ_How is your memory?                                   | -0.12     | 0.30 | 0.25   | 0.03      | 0.0 | 0.25   | 0.20      | 0.0 | 0.43   |
| Total*                                                    |           | 9    | (0.09) | 0.23      | 7   | (0.05) | 0.25      | 6   | (0.03) |

regression analysis.

\*Total denotes results of linear regression model (p value and multiple R2 (adjusted R2))
